# Supplementary material for: Gene Expression Profiling in Extranodal NK/T-Cell Lymphoma
Source: Research Square preprint supplement (doi:10.21203/rs.3.rs-114174/v1), 2020-12-04
Supplement: Supplementary file 1 [file a87484a55ca2262df923849e.docx]

**Original article**

**Gene Expression Profiling in Extranodal NK/T-cell Lymphoma**

Ji Yun Lee1*, Joo Hyun Kim 2*, Heejin Bang3, Junhun Cho4, Young Hyeh Ko4, [Seok Jin Kim](javascript:;)2, [Won Seog Kim](javascript:;)2

1Division of Hematology-Oncology, Department of Internal Medicine, Seoul National University Bundang Hospital, Seongnam, Korea

2Department of Health Sciences and Technology, Samsung Advanced Institute for Health Sciences and Technology, Samsung Medical Center, Sungkyunkwan University School of Medicine, Seoul, Korea

3Department of Pathology, Kangnam Sacred Heart Hospital, Hallym University College of Medicine, Seoul, Republic of Korea

4Department of Pathology and translational genomics, Samsung Medical Center, Sungkyunkwan University School of Medicine, Seoul, Korea

5Division of Hematology-Oncology, Samsung Medical Center, Sungkyunkwan University School of Medicine, Seoul, Korea

**Supplementary table 1. Association between EGR1 expression and patient’s characteristics**

|  | EGR1 > 95.3, n (%) | EGR1 ≤ 95.3, n (%) | *P*-value |
| --- | --- | --- | --- |
| Primary site |  |  |  |
| Nasal | 17 (85.0) | 15 (65.2) | 0.1381 |
| Non-nasal | 3 (15.0) | 8 (34.8) |  |
| Stage |  |  |  |
| I-II | 19 (95.0) | 12 (52.2) | 0.0018 |
| III-IV | 1 (5.0) | 11 (47.8) |  |
| PINK |  |  |  |
| Low | 15 (75.0) | 5 (21.7) | 0.0005 |
| Intermediate/High | 5 (25.0) | 18 (18.3) |  |
| PINK-E |  |  |  |
| Low | 8 (61.5) | 2 (10.5) | 0.0051 |
| Intermediate /High | 5 (35.5) | 17 (89.5) |  |
| Relapse |  |  |  |
| No | 7 (35.0) | 7 (30.4) | 0.7500 |
| Yes | 13 (65.0) | 16 (69.6) |  |

PINK, prognostic index for natural killer cell lymphoma; PINK-E, prognostic index for natural killer lymphoma–Epstein-Barr virus

**Supplementary table 2. EGR1 expression according to the immune subtyping**

| Immune subtype | IT | IE-A | IE-B | IS | *P*-value |
| --- | --- | --- | --- | --- | --- |
| (n = 3) | (n = 16) | (n = 9) | (n = 2) |
| EGR1 | 395.1 [272.6;546.3] | 185.1  [53.1;323.1] | 90.8  [42.0;178.3] | 41.6  [19.2;64.0] | 0.144 |

IT, immune tolerance; IE-A, immune evasion-A; IE-B, immune evasion-B; IS, immune silenced (IS).

**Supplementary table 3. 133 nCounter genes list**

| **No.** | **Genes** | **No.** | **Genes** | **No.** | **Genes** | **No.** | **Genes** |
| --- | --- | --- | --- | --- | --- | --- | --- |
| **1** | ADRB2 | **35** | CSF2 | **69** | KIR2DL1 | **103** | SH2D1B |
| **2** | AGT | **36** | CTLA4 | **70** | KIR2DL2 | **104** | SIRPA |
| **3** | ALK | **37** | CTSB | **71** | KIR2DL4 | **105** | SLC16A3 |
| **4** | ALS2 | **38** | CTSC | **72** | KIR2DS1 | **106** | SLC19A1 |
| **5** | ANK2 | **39** | CTSS | **73** | KIR2DS2 | **107** | SLC19A2 |
| **6** | ANXA3 | **40** | CXCR3 | **74** | KIR2DS5 | **108** | SLC7A7 |
| **7** | ARHGEF10 | **41** | CXCR4 | **75** | KLRC2 | **109** | SMARCA2 |
| **8** | ATP6V0D1 | **42** | CXCR7 | **76** | KLRD1 | **110** | SMOX |
| **9** | AXL | **43** | CYBB | **77** | LILRB1 | **111** | SNAP91 |
| **10** | BATF3 | **44** | CYP26A1 | **78** | LPAR1 | **112** | SOD2 |
| **11** | BTBD11 | **45** | DMRT1 | **79** | MSH6 | **113** | SOX8 |
| **12** | CAT | **46** | DNER | **80** | MYCN | **114** | SPAST |
| **13** | CCNA1 | **47** | EFNB2 | **81** | NCAM1 | **115** | STAT1 |
| **14** | CCNE1 | **48** | EGR1 | **82** | NKX2_1 | **116** | STK3 |
| **15** | CCR1 | **49** | FABP3 | **83** | NLRP7 | **117** | TBX21 |
| **16** | CCR10 | **50** | FASLG | **84** | NOTCH1 | **118** | TCN2 |
| **17** | CCR11 | **51** | FGF18 | **85** | NR1H3 | **119** | THY1 |
| **18** | CCR2 | **52** | FNTB | **86** | PCOLCE2 | **120** | TIAM2 |
| **19** | CCR3 | **53** | FPR1 | **87** | PDE4DIP | **121** | TMEM158 |
| **20** | CCR4 | **54** | FTL | **88** | PDXK | **122** | TMOD1 |
| **21** | CCR5 | **55** | GALNT2 | **89** | PELI1 | **123** | TNFRSF8 |
| **22** | CCR6 | **56** | GAS1 | **90** | PERP | **124** | TUBB2B |
| **23** | CCR7 | **57** | GATA3 | **91** | PITPNA | **125** | TUBB6 |
| **24** | CCR8 | **58** | GUCA2A | **92** | PLSCR1 | **126** | TYR |
| **25** | CCR9 | **59** | HCK | **93** | PRDX3 | **127** | UBE2L6 |
| **26** | CD244 | **60** | HPSE | **94** | PRKCB | **128** | WARS |
| **27** | CD28 | **61** | HRASLS | **95** | PRKG1 | **129** | WDFEY3 |
| **28** | CD40 | **62** | HS6ST2 | **96** | PSAP | **130** | WNK1 |
| **29** | CD59 | **63** | IFI30 | **97** | PTHLH | **131** | WNT7B |
| **30** | CDC14B | **64** | IFNG | **98** | RAMP3 | **132** | ZBTB17 |
| **31** | CHI3L1 | **65** | IL13RA1 | **99** | REL_1 | **133** | ZFYVE27 |
| **32** | CLTC | **66** | IL1RAP | **100** | ROBO1 |  |  |
| **33** | COL6A1 | **67** | JAK2 | **101** | S1PR3 |  |  |
| **34** | CREG1 | **68** | KIF3B | **102** | SEPT_6 |  |  |

**Supplementary table 4. Sequence of primers used in reverse transcription quantitative PCR (RT-qPCR)**

| **Gene symbols** | **Sequence** |
| --- | --- |
| EGR-1_Forward | AAA GTT TGC CAG GAG CGA TG |
| EGR1_Reverse | CAG GGG ATG GGT ATG AGG TG |
| GAS1_Forward | CCT CAT TCA GCT CAA CCA CA |
| GAS1_Reverse | CTT GGT GGA CTT GCA GTT CT |
| RAMP3_Forward | TGC AAC GAG ACA GGG ATG C |
| RAMP3_Reverse | GCA TCA TGT CAG CGA AGG C |
| CXCR7_Forward | ACA GGC TAT GAC ACG CAC TG |
| CXCR7_Reverse | ACG AGA CTG ACC ACC CAG AC |
| CD59_Forward | ATT TCA ACG ACG TCA CAA CCC |
| CD59_Reverse | CAG AAA TGG AGT CAC CAG CAG |
| GAPDH_Forward | ATC ATC AGC AAT GCC TCC T |
| GAPDH_Reverse | CAT CAC GCC ACA GTT TCC |

**Supplementary Figure 1. ROC curve of EGR1 expression and their area under the curve (AUC)**


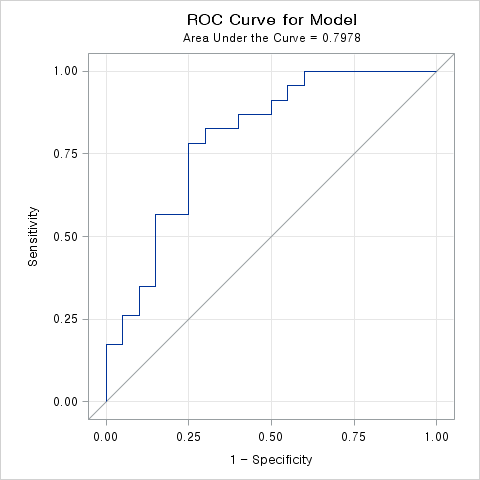

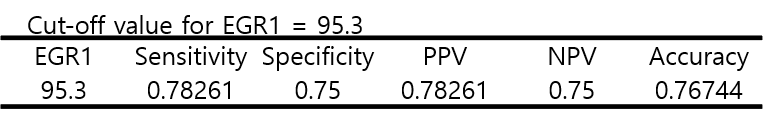


**Supplementary Figure 2. Kaplan-Meier survival curves for ENKTL patients according to EGR1 expression**


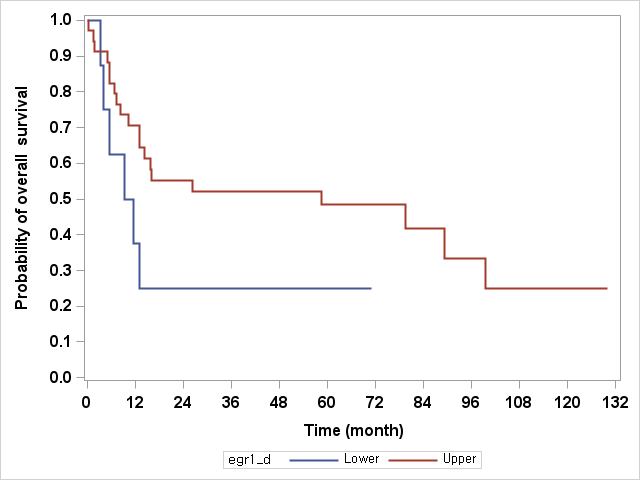


Cut-off value for EGR1 = 35.7
